# Supplementary material for: N-Doped carbon nanorods as ultrasensitive electrochemical sensors for the determination of dopamine
Source: Royal Society of Chemistry journal article supplement (doi:10.1039/c2ra21041j), 2012-01-01
Supplement: c2ra21041j.pdf [file c2ra21041j.pdf]

## Supporting Information

### **N-doped carbon nanorods as the ultrasensitive electrochemical sensors for the determination of dopamine**

**Dingsheng Yuan\*, Xiaoli Yuan, Shuangli Zhou, Wujun Zou, Tianxiang Zhou**

Department of Chemistry, Jinan University, Guangzhou 510632, P.R.China

E-mail: tydsh@jnu.edu.cn

#### **1. Preparations of PANI nanorods and carbon nanorods**

The PANI nanorods were prepared by a simple chemical oxidation using CTAB as the soft template and  $\text{FeCl}_3 \cdot 6\text{H}_2\text{O}$  as the oxidant. Typically, 50 mL of  $\text{H}_2\text{SO}_4$  solution (8 wt %) and 0.91 g of CTAB were added to a beaker. After stirring for half an hour till CTAB dissolved completely, 1.00 g of aniline was added to the above solution and stirred for 1 h to form a white precipitate. Then, 20 mL of  $0.25 \text{ mol L}^{-1} \text{FeCl}_3 \cdot 6\text{H}_2\text{O}$  aqueous solution was added to the above suspended mixture drop by drop and stirred for 24 h, the green product was filtrated and washed with deionized water till the filtrate became neutral, and finally dried at  $60 \text{ }^\circ\text{C}$  for 24 h under vacuum to get PANI nanorods. The as-synthesized PANI was carbonized under high-pure nitrogen atmosphere from  $600 \text{ }^\circ\text{C}$  for 2 h to form N-doped carbon nanorods.

## 2. The specific surface area and the pore parameters of N-CNRs

Table S1 The specific surface area and the pore parameters of N-CNRs

| Samples | $S_{\text{BET}}$<br>( $\text{m}^2\text{g}^{-1}$ ) | <i>Average Pore size</i><br>(nm) | $V_{\text{total}}$<br>( $\text{cm}^3\text{g}^{-1}$ ) | $V_{\text{meso}}$<br>( $\text{cm}^3\text{g}^{-1}$ ) | $V_{\text{micro}}$<br>( $\text{cm}^3\text{g}^{-1}$ ) |
|---------|---------------------------------------------------|----------------------------------|------------------------------------------------------|-----------------------------------------------------|------------------------------------------------------|
| N-CNRs  | 362                                               | 18.72                            | 0.24                                                 | 0.10                                                | 0.14                                                 |
